# Supplementary material
Source: Copernicus journal article supplement (doi:10.5194/bg-23-3965-2026)
Supplement: Supplementary file 1 [file bg-23-3965-2026-supplement.pdf]

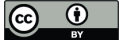

*Supplement of*

## **Surface area and $\Omega$ -aragonite oversaturation as controls of the runaway precipitation process in ocean alkalinity enhancement**

**Niels Suitner et al.**

*Correspondence to:* Niels Suitner ([niels.suitner@uni-hamburg.de](mailto:niels.suitner@uni-hamburg.de)) and Jens Hartmann ([geo@hattes.de](mailto:geo@hattes.de))

The copyright of individual parts of the supplement might differ from the article licence.

## 1 Supplement

### 2 Overview experimental setups:

#### 3 Gran Canaria (Taliarte, Spain - 27.988°N 15.367°W)

4 (adapted from Hartmann et al., 2023)

5 Oligotrophic coastal seawater ( $TA_{\text{initial}} \sim 2411 \pm 5 \mu\text{mol kg}^{-1}$ ,  $DIC \sim 2006 \pm 16 \mu\text{mol kg}^{-1}$ ,  $pH \sim 8.15 \pm 0.02$ ,  $\Omega_{\text{aragonite}}$   
6  $4.4 \pm 0.3$ , Sal.  $\sim 36.6$  Temp.  $\sim 23 \text{ }^{\circ}\text{C}$ ) was taken at 4 m depth in the vicinity of the harbor of Taliarte on the 16<sup>th</sup> of  
7 September 2021. Nine batch solutions were prepared adding TA in nine steps of  $300 \mu\text{mol kg}^{-1}$ , starting at an  
8 initial alkalinity value of  $\sim 2400 \mu\text{mol kg}^{-1}$  (fresh untreated seawater,  $\Delta TA_0$ ), with a maximum final treatment of  
9  $TA_{\text{final}} \sim 4800 \mu\text{mol kg}^{-1}$  ( $\Delta TA_{2400}$ ). The TA enhancement was achieved by adding volumes of 0.5M NaOH stock  
10 solution. After taking an initial sample (day 0) from every batch, the remaining solutions were filled in portions  
11 of  $\sim 525 \text{ g}$  into 500mL Dickson, each for a duration of 24 or 96 h. All bottles were stored airtight in the dark, at a  
12 temperature of  $\sim 24^{\circ}\text{C}$ . For sampling each treatment was filtered through a  $0.2 \mu\text{m}$  filter to stop possible further  
13 reactions on larger particles and remove the biomass from the biotic approaches for further analysis. While  
14 filtering, all systems were kept airtight as much as possible to prevent gas exchange with the atmosphere.  
15 Samples were measured for TA, pH, salinity, conductivity, and temperature. TA was determined by titration with  
16  $0.02 \text{ M}$  hydrochloric acid using an 888 Titrande autosampler (Metrohm). Calibration of TA and DIC measurements  
17 was determined against certified reference materials (CRM batches 143 and 190), supplied by Andrew Dickson,  
18 Scripps Institution of Oceanography (USA). To analyze for pH, salinity, conductivity, and temperature a WTW  
19 multimeter (MultiLine® Multi 3630 IDS, pH-probe: SenTix 940 pH-electrode, conductivity: TetraCon 925 cell,  
20 Xylem) was employed. The pH-probe was calibrated with WTW buffer solutions according to NIST/PTB in four  
21 steps ( $1.679\text{--}9.180$  at  $25 \text{ }^{\circ}\text{C}$ ) and corrected for seawater after Badocco et al. (2021). For the TetraCon 925 cell  
22  $0.01 \text{ mol L}^{-1}$  KCl calibration standards for conductivity cells (WTW, traceable to NIST/PTB) were used.

23

#### 24 Raunefjorden (Bergen, Norway - 60.27° N, 5.20° E)

25 (adapted from Suitner et al., 2024)

26 Four sets of experiments were conducted between May and July 2022 using natural seawater from Raunefjorden  
27 ( $60.27^{\circ} \text{ N}$ ,  $5.20^{\circ} \text{ E}$ ), close to the Espeland marine biological station (Bergen, Norway). All four experiments used  
28 the same setup. Firstly, 250 mL polystyrene cell culture bottles were filled with filtered seawater in a flow-  
29 through incubation box (PMMA) and incubated outdoors to follow the local light conditions. The box was covered  
30 in blue foil (172 Lagoon Blue Foil, LEE Filters, Burbank, CA, United States) to mimic the light conditions in the  
31 fjord at a depth of  $\sim 5 \text{ m}$ . The temperature was regulated by recirculating fjord water in the incubation box, thus  
32 ensuring that the incubation temperature matched that of the fjord. To prevent the occurrence of substantial  
33 headspace throughout the experiment, each treatment level was divided into three to four separate bottles. The  
34 division allowed progressive volume removal during sampling while reducing the potential for gas exchange  
35 processes. Within each experiment, a new set of bottles was opened sequentially after three to four samplings.  
36 Alkalinity was enhanced using a  $0.5 \text{ M}$  NaOH (sodium hydroxide) stock solution for the non- $\text{CO}_2$ -equilibrated  
37 treatments and a combination of  $\text{NaHCO}_3$  (sodium bicarbonate,  $0.4 \text{ M}$ ) and  $\text{Na}_2\text{CO}_3$  (sodium carbonate,  $0.2 \text{ M}$ )

38 stock solutions for the preparation of the CO<sub>2</sub>-equilibrated treatments. The latter were adjusted to attain  
39 equilibrium with the surrounding air's CO<sub>2</sub> concentration (~420 μatm). For each of the two, the experimental  
40 setups encompassed (1) abiotic conditions, achieved by removing organisms via filtration through a 0.2 μm filter,  
41 and (2) biotic conditions, where only the small phytoplankton community was included by using a 50 μm filter  
42 mesh to remove larger particles and organisms. The categorization into abiotic and biotic treatments aimed to  
43 determine the potential influences of biological activity or naturally occurring sediments, while also preserving  
44 the comparability of the experimental setup described in Hartmann et al. (2023). The experiments were  
45 conducted over a span of 2 months, with each incubation run for 20 or 25 d. The experiments were therefore  
46 partially separated in time, resulting in slight variations in starting conditions and average temperatures, ranging  
47 from 10 to 16 °C. Biotic and abiotic treatments were simultaneously conducted within each equilibration mode.  
48 The initial carbonate chemistry parameters of the collected seawater before manipulation were relatively  
49 constant for all approaches (TA<sub>initial</sub> ~2190 ± 10 μmol kg<sup>-1</sup>, DIC ~1890 ± 20 μmol kg<sup>-1</sup>, pH ~8.25 ± 0.05, Ω<sub>aragonite</sub>  
50 2.8 ± 0.4 and Sal. ~32.6 ± 0.1).

51 For carbonate chemistry analysis, 40–50 mL of incubated water was taken per sampling day and treatment level.  
52 Using a peristaltic pump connected to a 0.2 μm syringe filter, samples were filtered immediately to stop further  
53 reactions, remove particles, and prepare each sample for measurements. All treatments were measured without  
54 replicates for TA, pH, temperature, and salinity. Methods and devices for measuring TA, pH, temperature, and  
55 salinity were identical to experiments in Hartmann et al. (2023) – see above.

56 **Outliers:**

57 (adapted from Suitner et al., 2024)

58 Each TA treatment level (Raunefjorden, Bergen) was divided into three individual bottles. These bottles were  
59 sampled at defined time intervals. For the filtered CO<sub>2</sub>-equilibrated experiment a complete set of bottles  
60 (sampling days 6 and 8), exhibited stable parameters at the same level throughout the experiment. In contrast,  
61 the set with the related sampling days 10, 15, and 20, continued the process of runaway precipitation uniformly.  
62 A similar phenomenon was observed in the filtered non-CO<sub>2</sub>-equilibrated experiment. Again, bottles sampled on  
63 days 8, and 10 exhibited no significant changes, while bottles sampled on days 15, 20, and 25 showed continued  
64 precipitation. Despite thorough examination and multiple repetitive measurements on-site, no explanation for  
65 this behavior could be determined. The temporal alignment of both incidents (occurring between June 24 and  
66 June 28, 2022) suggests that an environmental factor, such as water temperature, sunlight intensity, or a specific  
67 aspect of the sampling procedure might have affected related bottles. Errors during the measurements were  
68 excluded by numerous iterations with check standards. Furthermore, the simultaneous impact on pH and TA  
69 indicates that the measured values were accurate.

70

## TA evolution filtered, equilibrated experiment

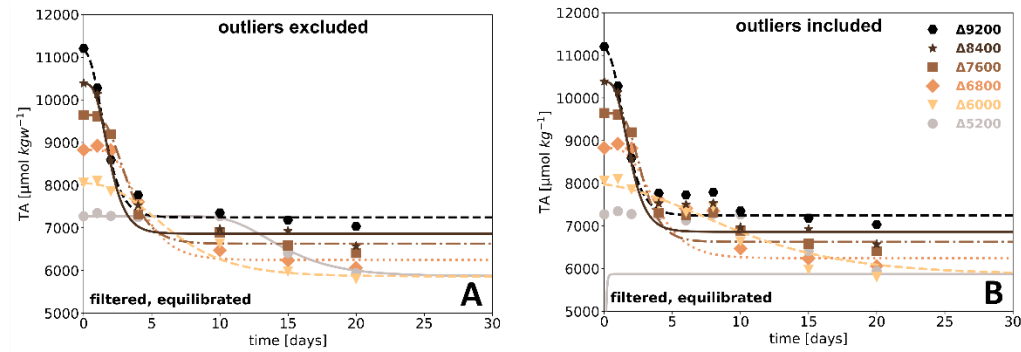

## TA loss rates and curve fits, filtered equilibrated experiment

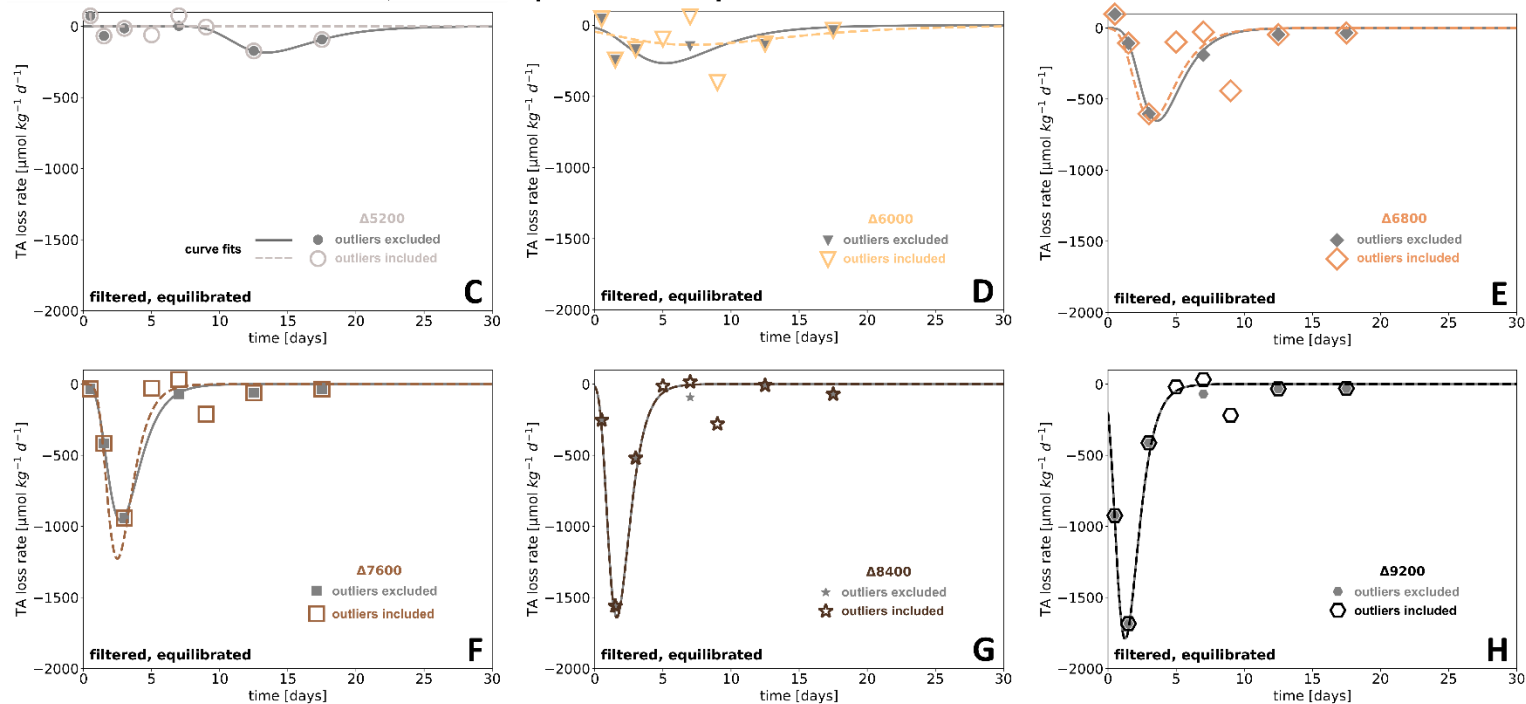

Figure S1: Comparison of TA evolution, TA loss rates, and corresponding curve fits with and without outliers, in the filtered equilibrated treatments. TA evolution excluding outliers (A) and including outliers (B). (C-H) TA loss rates and curve fits for each treatment level entering an accelerated precipitation phase, solid gray markers and lines: without outliers, hollow markers and dashed lines: outliers included. Curve fits differ in case outliers appear to fall into the accelerate precipitation phase of a treatment level, excluding the outliers was met by averaging the rate between the last and first measurement point before and after the period with outliers (days 6 and 8)

### TA evolution filtered, non-equilibrated experiment

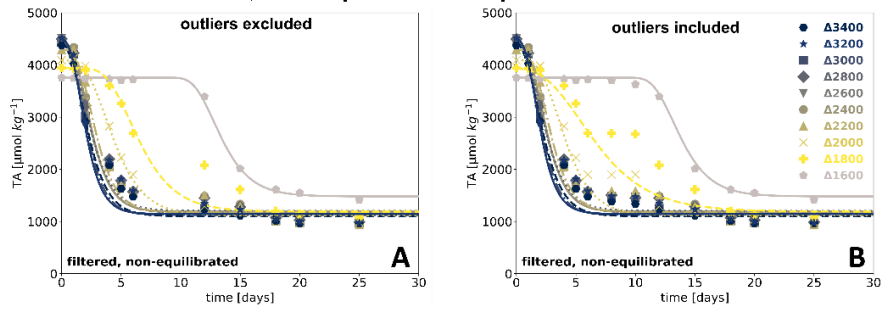

### TA loss rates and curve fits, filtered non-equilibrated experiment

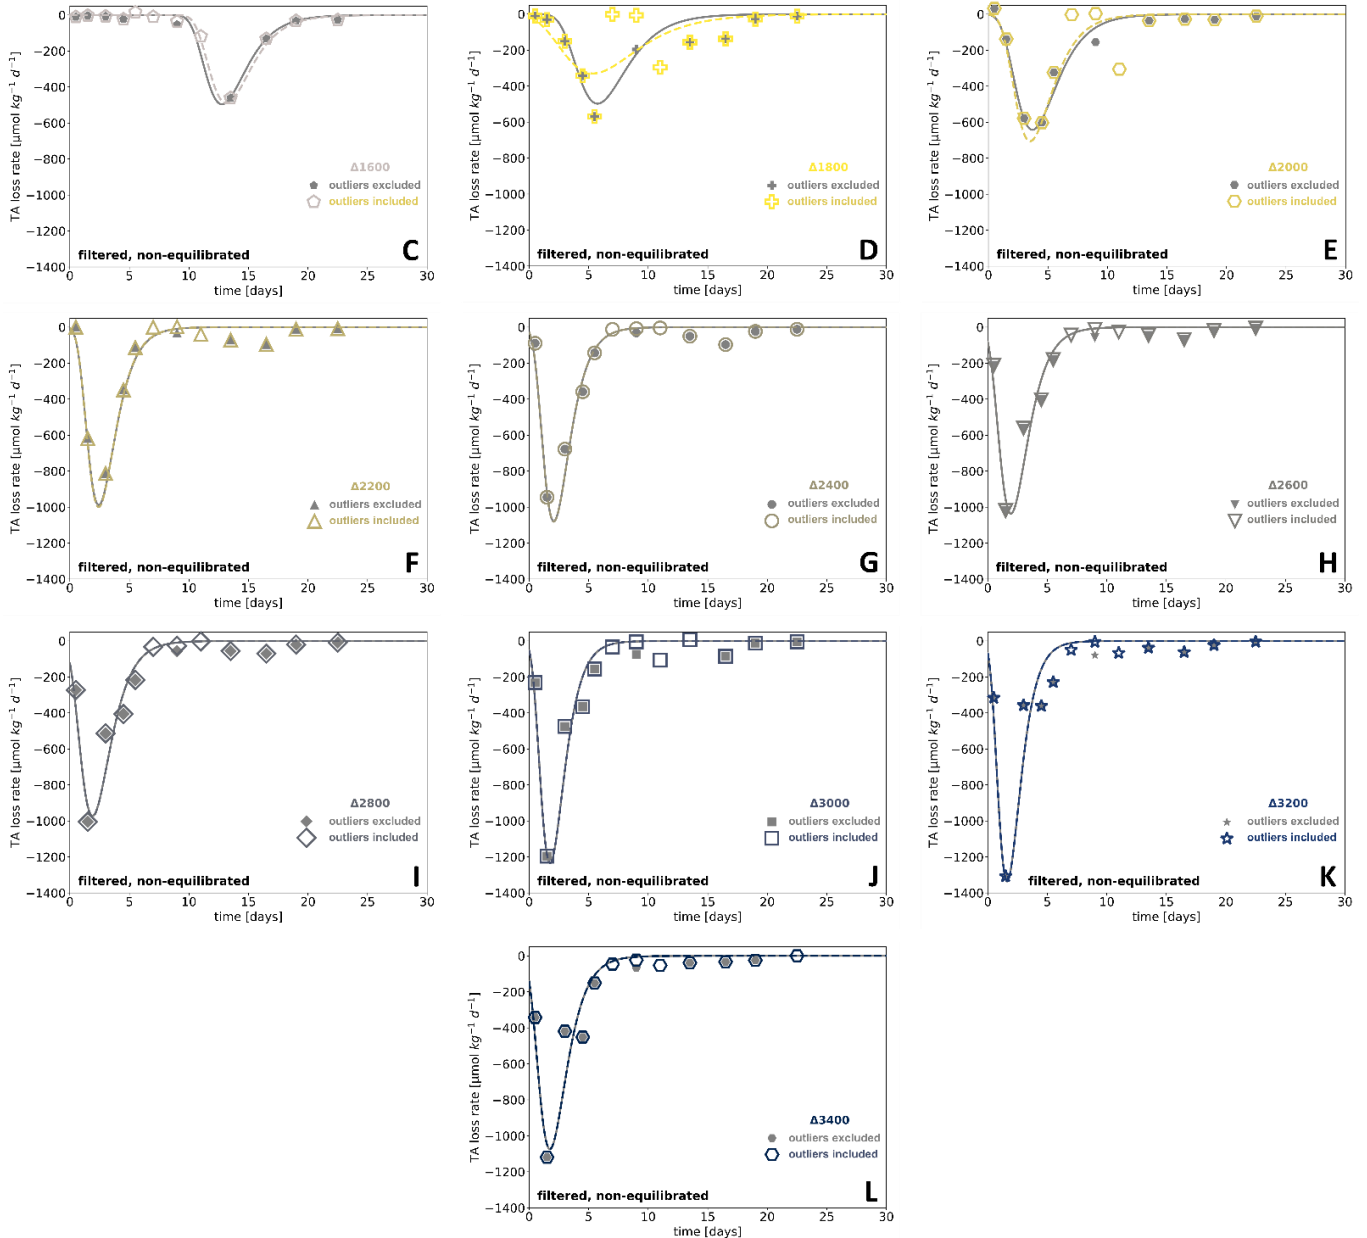

Figure S2: Comparison of TA evolution, TA loss rates, and corresponding curve fits with and without outliers, in the filtered non-equilibrated treatments. TA evolution excluding outliers (A) and including outliers (B). (C-L) TA loss rates and curve fits for each treatment level entering an accelerated precipitation phase, solid markers and lines: without outliers, hollow markers and dashed lines: outliers included.

## Comparison of carbonate precipitation kinetics—with and without outliers

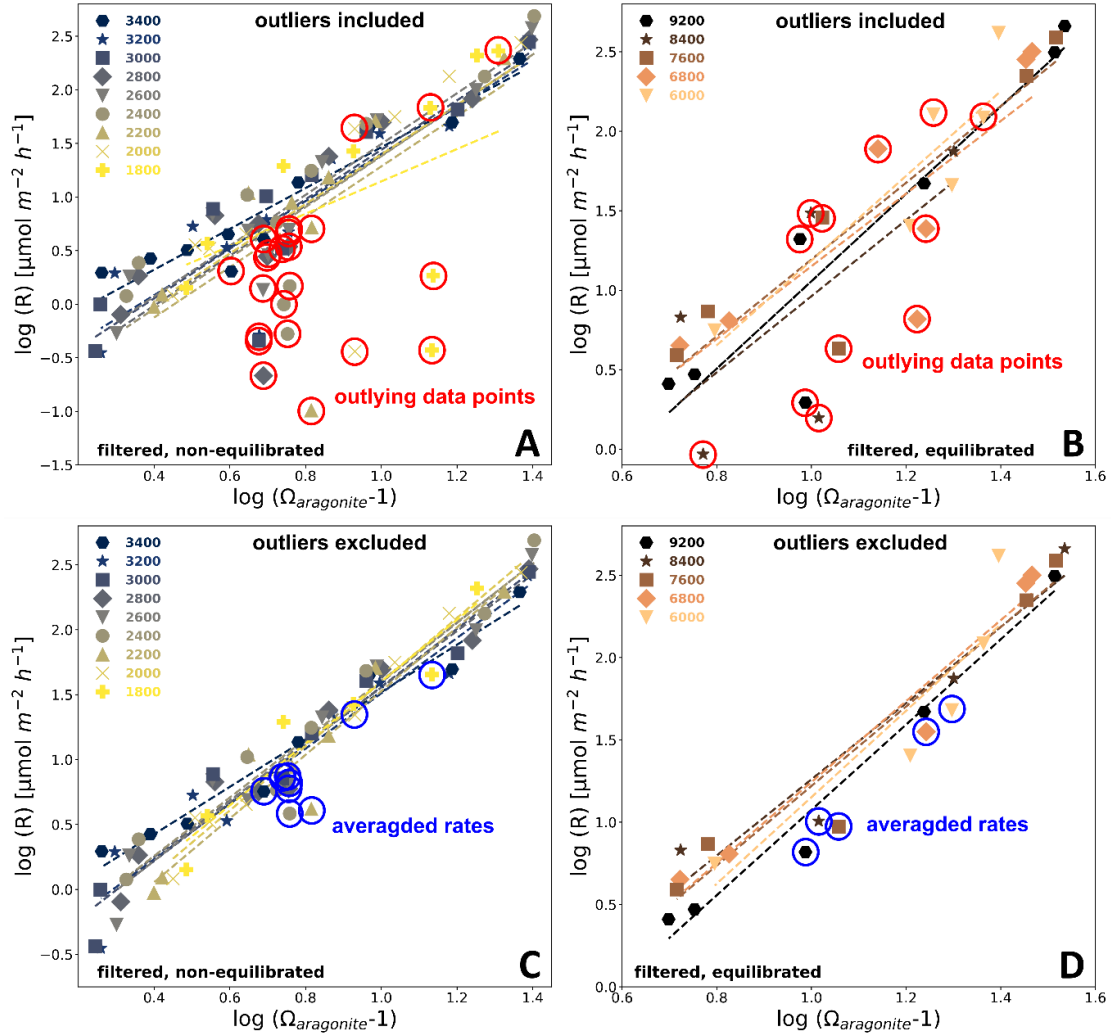

Figure S3: Comparison of carbonate precipitation kinetics for filtered treatments that entered the APP; (A) filtered neq with outliers, (B) filtered eq with outliers, (C) filtered neq without outliers, (D) filtered eq without outliers, red outlined data points: excluded outliers, note that some outliers exhibited an increase in TA during the precipitation process and could therefore not be plotted on a logarithmic scale; blue outlined data points: rates representing the average rate calculated between the last and first datapoint before and after the precipitation halted.

74 *Table S1: Overview of the rate equation for the filtered neq approach, comparing scenarios with and without outliers. Also see*  
 75 *Fig. S3.*

| <b>Treatment</b>              | $\log(R) = n(\Omega_{ar} - 1) + \log(k)$ |        |                |                          |        |                |
|-------------------------------|------------------------------------------|--------|----------------|--------------------------|--------|----------------|
|                               | <b>Outliers excluded</b>                 |        |                | <b>Outliers included</b> |        |                |
| <b><math>\Delta TA</math></b> | n                                        | log(k) | R <sup>2</sup> | n                        | log(k) | R <sup>2</sup> |
| <b>3400</b>                   | 1.82                                     | -0.30  | 0.963          | 1.90                     | -0.44  | 0.908          |
| <b>3200</b>                   | 2.13                                     | -0.62  | 0.929          | 2.20                     | -0.79  | 0.788          |
| <b>3000</b>                   | 2.24                                     | -0.68  | 0.955          | 2.31                     | -0.87  | 0.793          |
| <b>2800</b>                   | 2.18                                     | -0.62  | 0.959          | 2.33                     | -0.95  | 0.707          |
| <b>2600</b>                   | 2.29                                     | -0.70  | 0.952          | 2.37                     | -0.88  | 0.871          |
| <b>2400</b>                   | 2.25                                     | -0.64  | 0.924          | 2.37                     | -0.99  | 0.658          |
| <b>2200</b>                   | 2.45                                     | -0.93  | 0.906          | 2.35                     | -1.06  | 0.459          |
| <b>2000</b>                   | 2.47                                     | -0.88  | 0.984          | 2.31                     | -0.91  | 0.575          |
| <b>1800</b>                   | 2.38                                     | -0.78  | 0.924          | 1.51                     | -0.36  | 0.214          |

76

77

78

79 *Table S2: Overview of the rate equation for the filtered eq approach, comparing scenarios with and without outliers. Also see*  
 80 *Fig. S3.*

| <b>Treatment</b>              | $\log(R) = n(\Omega_{ar} - 1) + \log(k)$ |        |                |                          |        |                |
|-------------------------------|------------------------------------------|--------|----------------|--------------------------|--------|----------------|
|                               | <b>Outliers excluded</b>                 |        |                | <b>Outliers included</b> |        |                |
| <b><math>\Delta TA</math></b> | n                                        | log(k) | R <sup>2</sup> | n                        | log(k) | R <sup>2</sup> |
| <b>9200</b>                   | 2.59                                     | -1.52  | 0.823          | 2.60                     | -1.56  | 0.825          |
| <b>8400</b>                   | 2.31                                     | -1.05  | 0.963          | 2.81                     | -1.80  | 0.718          |
| <b>7600</b>                   | 2.41                                     | -1.19  | 0.942          | 2.41                     | -1.22  | 0.842          |
| <b>6800</b>                   | 2.46                                     | -1.22  | 0.925          | 2.28                     | -1.13  | 0.690          |
| <b>6000</b>                   | 2.63                                     | -1.47  | 0.977          | 2.66                     | -1.48  | 0.799          |

81

82 *Table S3: Overview of coefficients for unfiltered neq treatments, also see Fig. 3 for the related numerical curve fits and Tab.*  
 83 *S8 for cross-comparison of all treatments.*

| <b>Treatment</b>              | $f(t) = a e^{-be^{-ct}} + d$ |          |          |          |                      |
|-------------------------------|------------------------------|----------|----------|----------|----------------------|
| <b><math>\Delta TA</math></b> | <b>a</b>                     | <b>b</b> | <b>c</b> | <b>d</b> | <b>R<sup>2</sup></b> |
| <b>2800</b>                   | -3162.94                     | 5.88     | 0.64     | 4426.60  | 0.97                 |
| <b>2600</b>                   | -3184.57                     | 6.66     | 0.66     | 4458.90  | 0.94                 |
| <b>2400</b>                   | -3162.95                     | 5.09     | 0.65     | 4466.20  | 0.99                 |
| <b>2200</b>                   | -3091.21                     | 5.22     | 0.38     | 4292.50  | 0.96                 |
| <b>2000</b>                   | -2841.46                     | 24.49    | 0.40     | 4106.00  | 0.98                 |
| <b>1800</b>                   | -2503.10                     | 86.03    | 0.35     | 3924.60  | 0.99                 |
| <b>1600</b>                   | -1932.75                     | -252.65  | -0.30    | 3686.50  | 1.00                 |

84

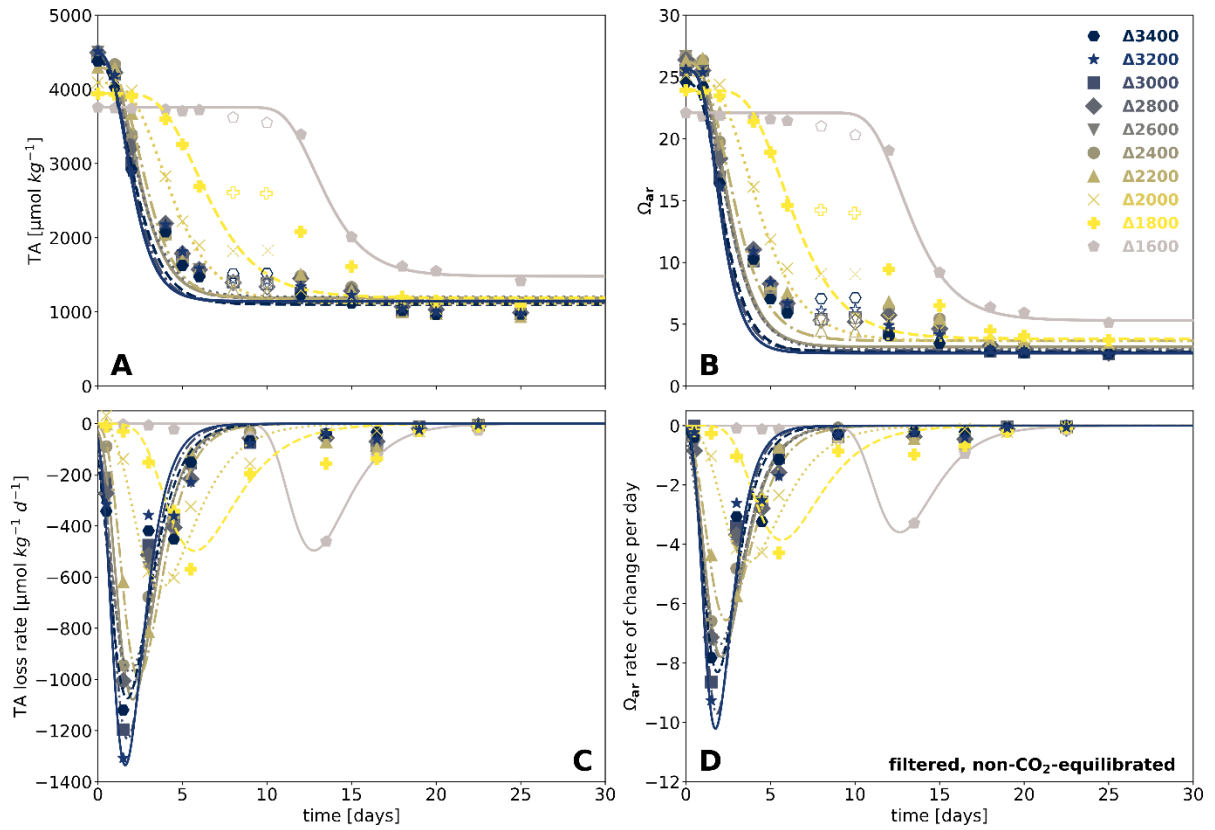

Figure S4: Results of the numerical curve fits – for the filtered neq approach, TA evolution over time (A),  $\Omega_{ar}$  evolution over time (B), TA-loss rate over time (C),  $\Omega_{ar}$  rate of change over time (D) Line plots: curve-fitted continuous functions, markers: measured data points, hollow markers: excluded datapoints, see chapter on outliers above, also see Tab. S4 for the determined coefficients of the curve fit.

87 Table S4: Overview of the coefficients for the filtered neq treatments curve fits, also see Fig. S4 and Tab. S8.

| Treatment   | $f(t) = a e^{-be^{-ct}} + d$ |       |      |        |                |
|-------------|------------------------------|-------|------|--------|----------------|
| $\Delta TA$ | a                            | b     | c    | d      | R <sup>2</sup> |
| 3400        | -3359.0                      | 4.55  | 0.87 | 4460.4 | 0.86           |
| 3200        | -3368.1                      | 5.76  | 1.08 | 4511.3 | 0.87           |
| 3000        | -3312.2                      | 5.94  | 1.01 | 4437.7 | 0.90           |
| 2800        | -3294.8                      | 4.59  | 0.80 | 4497.5 | 0.90           |
| 2600        | -3333.5                      | 5.17  | 0.84 | 4506.1 | 0.91           |
| 2400        | -3238.0                      | 6.51  | 0.91 | 4426.4 | 0.94           |
| 2200        | -3121.7                      | 8.06  | 0.86 | 4294.1 | 0.96           |
| 2000        | -2976.7                      | 8.75  | 0.59 | 4090.1 | 0.95           |
| 1800        | -2753.5                      | 16.77 | 0.49 | 3943.1 | 0.89           |

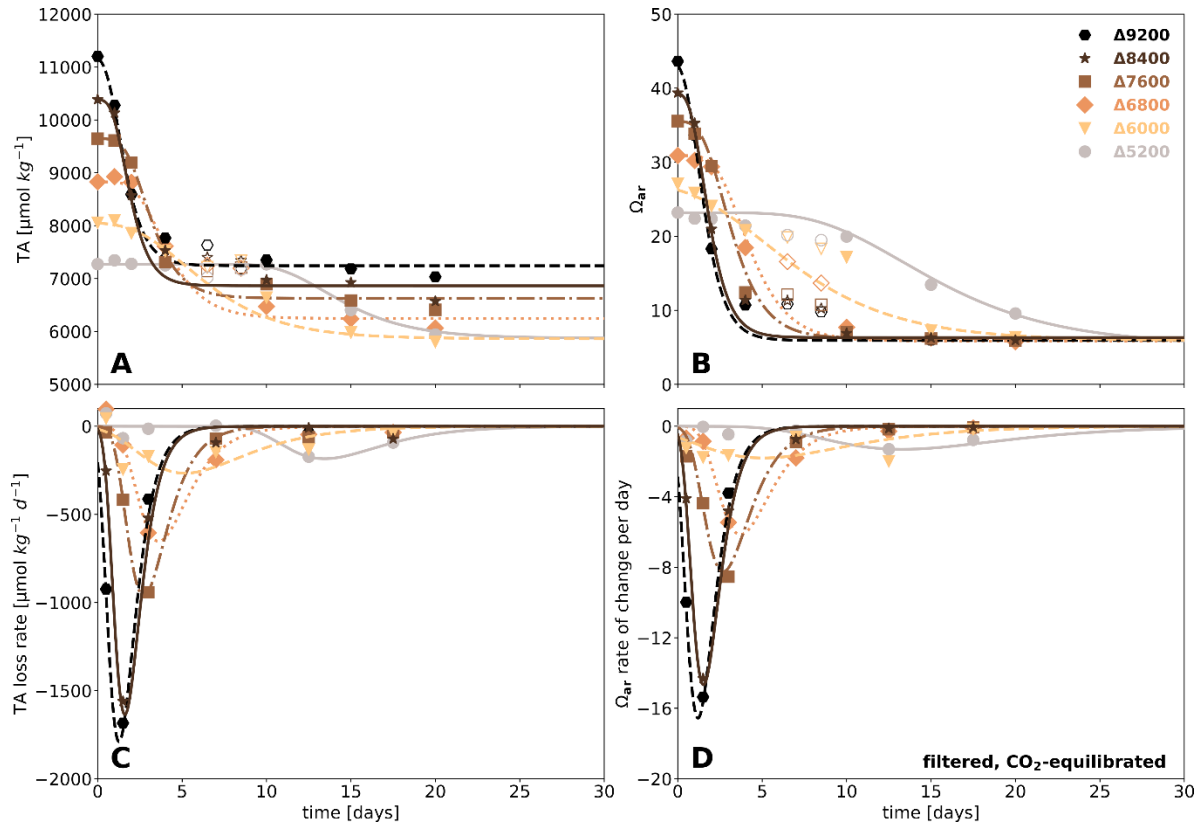

Figure S5: Results of the numerical curve fits – for the filtered eq approach, TA evolution over time (A),  $\Omega_{ar}$  evolution over time (B), TA-loss rate over time (C),  $\Omega_{ar}$  rate of change over time (D). Line plots: curve-fitted continuous functions, markers: measured data points, hollow markers: excluded datapoints, see chapter on outliers above, also see Tab. S5 for the determined coefficients of the curve fit.

89

90 Table S5: Overview of the coefficients for the filtered eq treatments curve fits, also see Fig. S5 and Tab. S8.

| Treatment   | $f(t) = a e^{-be^{-ct}} + d$ |        |      |         |       |
|-------------|------------------------------|--------|------|---------|-------|
| $\Delta TA$ | a                            | b      | c    | d       | $R^2$ |
| 9200        | -3957.4                      | 4.73   | 1.23 | 11202.3 | 0.99  |
| 8400        | -3522.1                      | 7.65   | 1.26 | 10387.4 | 0.98  |
| 7600        | -3017.7                      | 10.63  | 0.87 | 9646.6  | 1.00  |
| 6800        | -2583.1                      | 11.99  | 0.69 | 8829.9  | 0.99  |
| 6000        | -2499.5                      | 5.50   | 0.33 | 8058.7  | 0.70  |
| 5200        | -1401.0                      | 121.95 | 0.36 | 7273.7  | 0.99  |

91

92

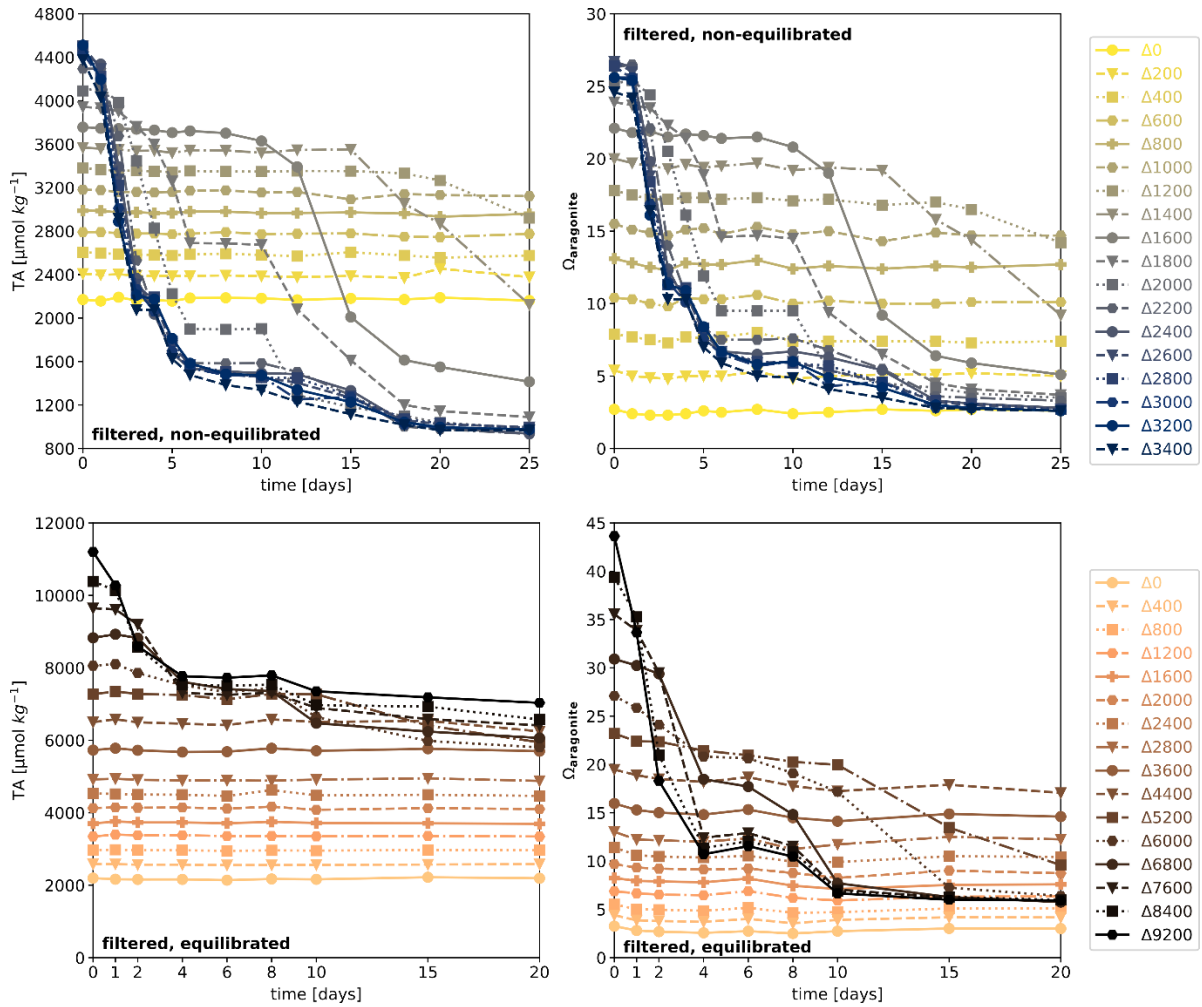

Figure S6: TA and  $\Omega_{ar}$  raw data of the filtered treatment for cross comparison. See Suitner et al. (2024) for further details.

Figure S7: Regressions describing the relationships between the coefficient (**b**) and the modeled induction time [A], as well as the coefficient (**c**) and the modeled APP timespan [B] for each approach. The shown regressions allow for the conversion of specifiable time-dependent characteristics of a runaway process to the coefficients of the presented inverse logistic function (Eq. (1)). Specified relationships should not be generalized and are only valid within the given conditions of each approach.

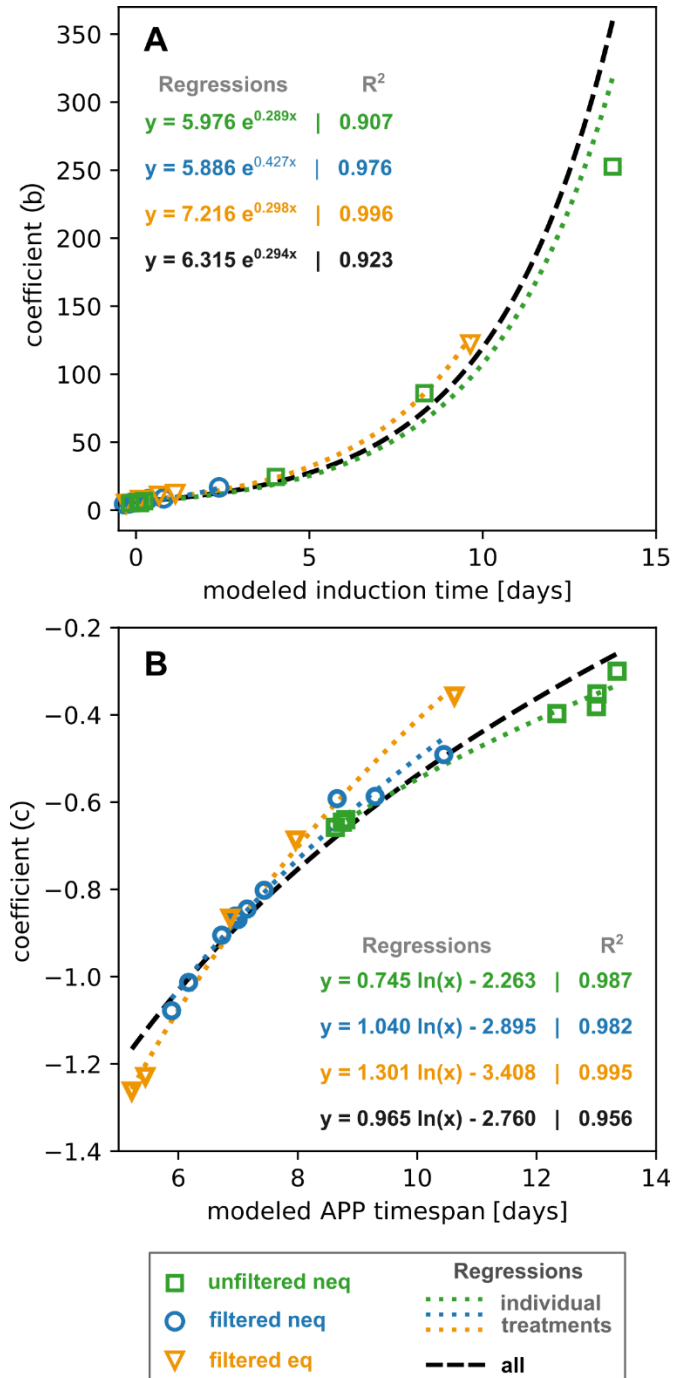

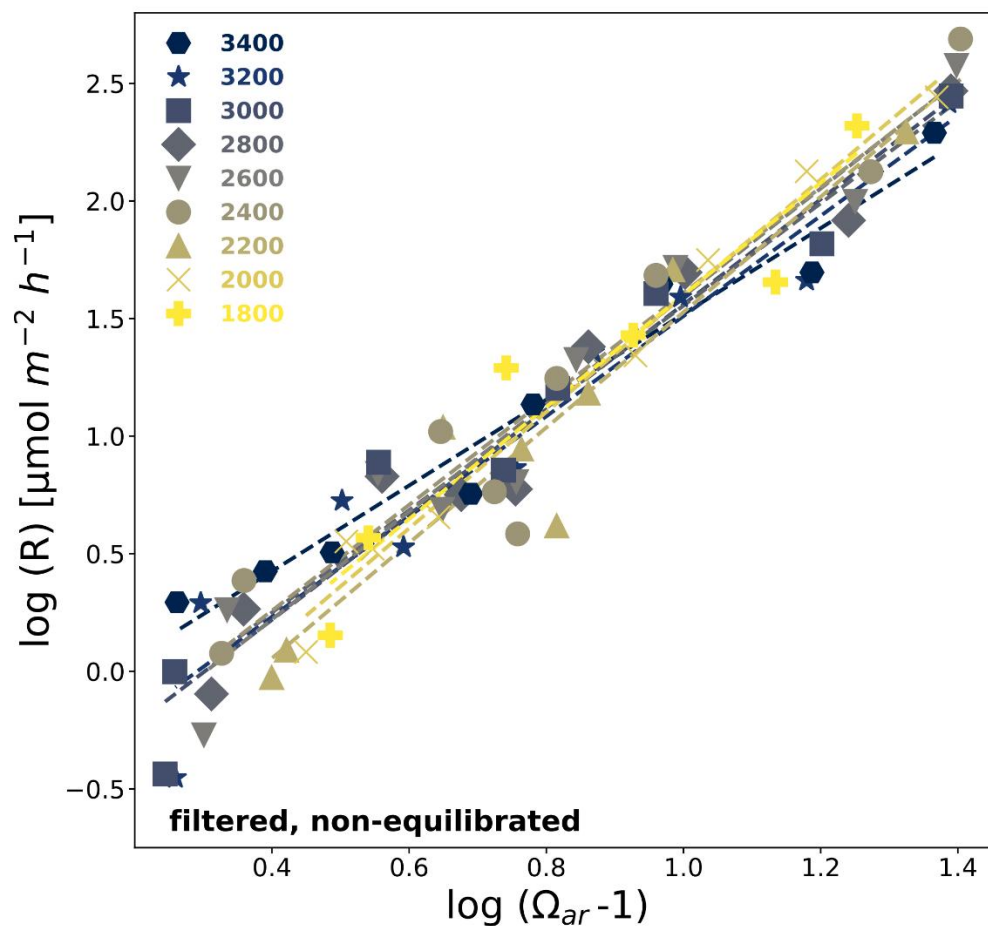

95 *Figure S8: Carbonate precipitation kinetics for filtered neq treatments that entered the APP; see Tab. S6 for the related*  
 96 *regressions and rate equations.*

97  
 98 *Table S6: Overview of coefficients and regressions of empirical rate equations for filtered neq treatments, also see Fig. S8 and*  
 99 *Tab. S8.*

| Treatment   | $\log(R) = n(\Omega_{ar} - 1) + \log(k)$ |           |       |                |
|-------------|------------------------------------------|-----------|-------|----------------|
| $\Delta TA$ | n                                        | $\log(k)$ | $R^2$ | $\hat{\sigma}$ |
| 3400        | 1.82                                     | -0.30     | 0.963 | 0.080          |
| 3200        | 2.13                                     | -0.62     | 0.929 | 0.110          |
| 3000        | 2.24                                     | -0.68     | 0.955 | 0.095          |
| 2800        | 2.18                                     | -0.62     | 0.959 | 0.080          |
| 2600        | 2.29                                     | -0.70     | 0.952 | 0.089          |
| 2400        | 2.25                                     | -0.64     | 0.924 | 0.107          |
| 2200        | 2.45                                     | -0.93     | 0.906 | 0.100          |
| 2000        | 2.47                                     | -0.88     | 0.984 | 0.047          |
| 1800        | 2.38                                     | -0.78     | 0.924 | 0.097          |
| all         | 2.22                                     | -0.66     | 0.937 | 0.201          |

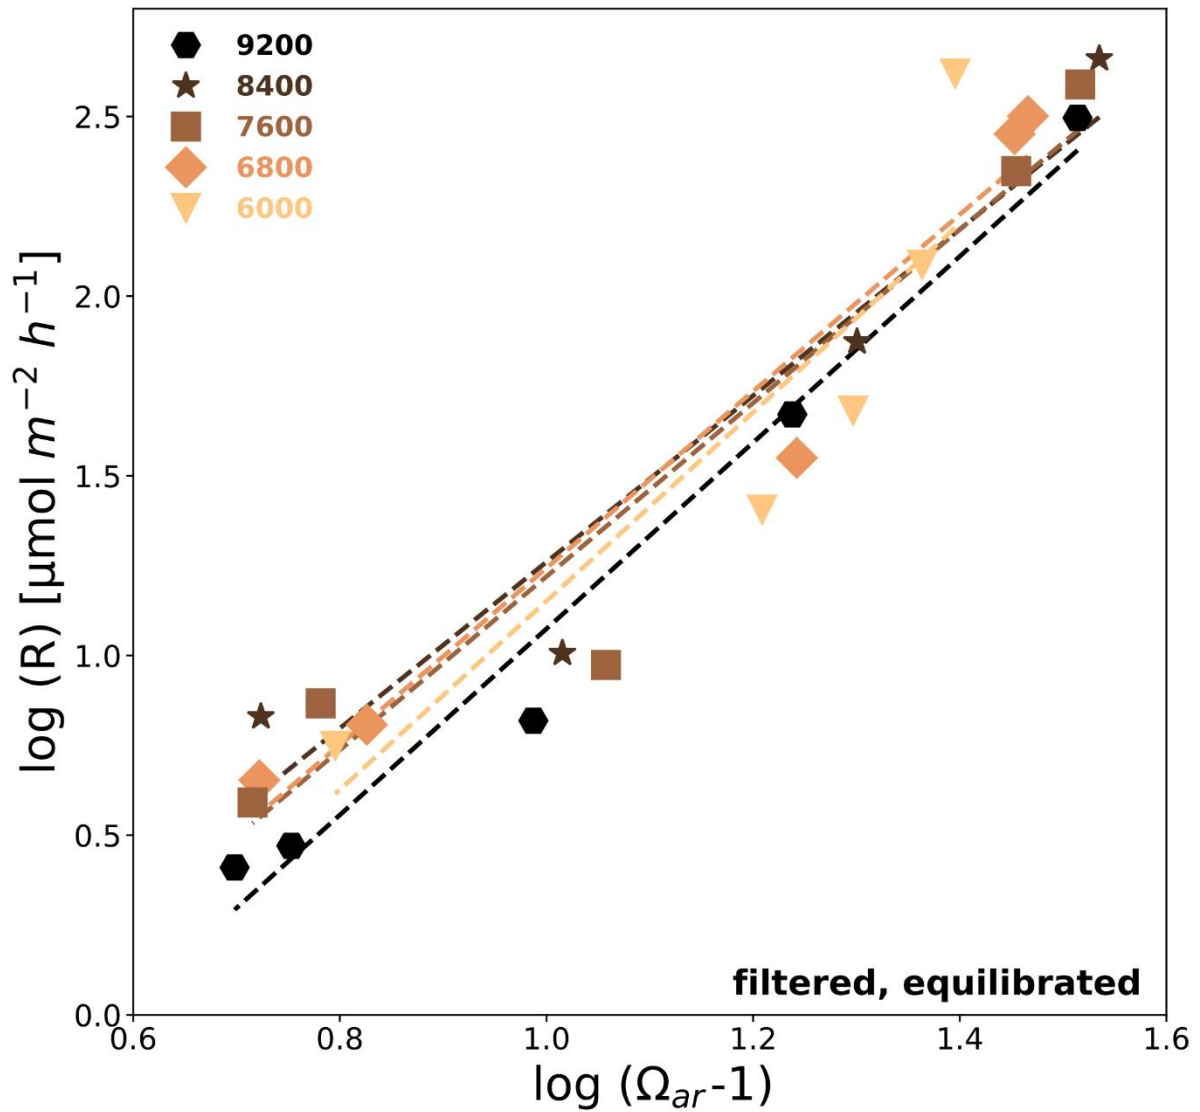

101 *Figure S9: Carbonate precipitation kinetics for filtered eq treatments that entered the APP; see Tab. S7 for related regressions*  
 102 *and rate equations.*

103

104 *Table S7: Overview of coefficients and regressions of empirical rate equations for filtered eq treatments, also see Fig. S9 and*  
 105 *Tab. S8.*

| Treatment   | $\log(R) = n(\Omega_{ar} - 1) + \log(k)$ |           |       |                |
|-------------|------------------------------------------|-----------|-------|----------------|
| $\Delta TA$ | n                                        | $\log(k)$ | $R^2$ | $\hat{\sigma}$ |
| 9200        | 2.59                                     | -1.52     | 0.823 | 0.118          |
| 8400        | 2.31                                     | -1.05     | 0.963 | 0.078          |
| 7600        | 2.41                                     | -1.19     | 0.942 | 0.103          |
| 6800        | 2.46                                     | -1.22     | 0.925 | 0.118          |
| 6000        | 2.63                                     | -1.47     | 0.977 | 0.060          |
| all         | 2.49                                     | -1.31     | 0.931 | 0.214          |

106

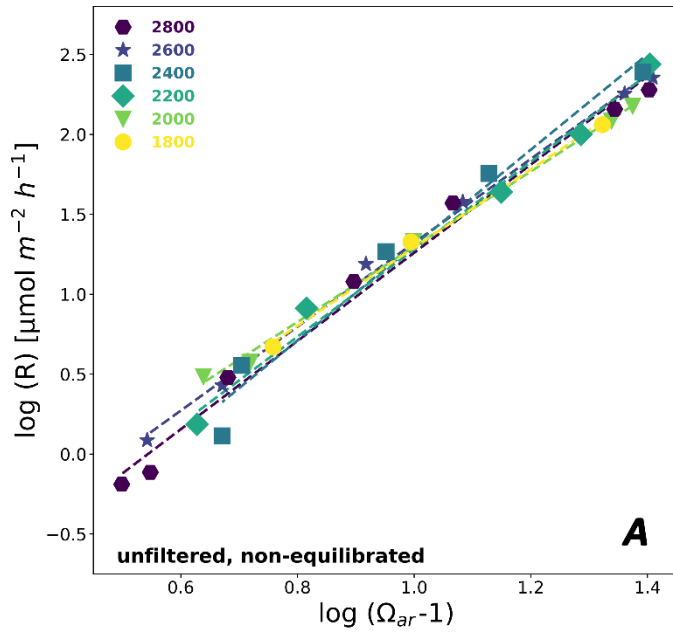

Figure S10: Comparison carbonate precipitation kinetics. (A) unfiltered, neq (B) filtered neq, (C) filtered eq treatments. Original plots shown in Fig. 6, S8 and S9.

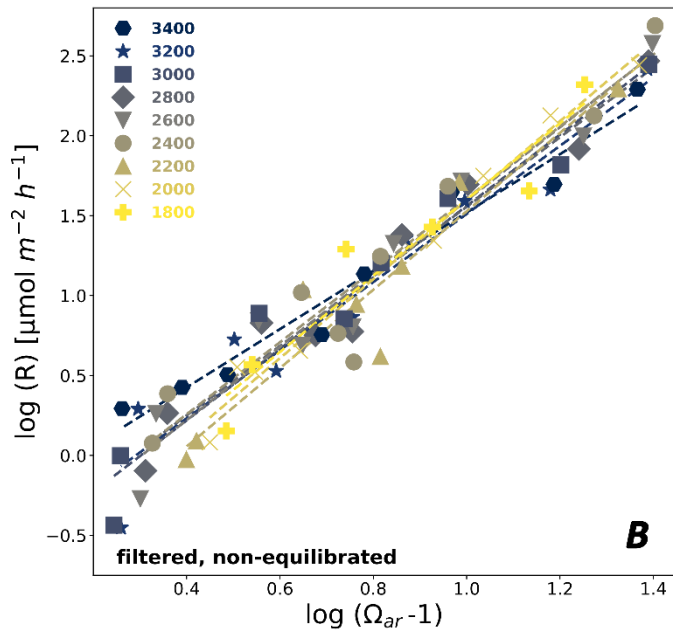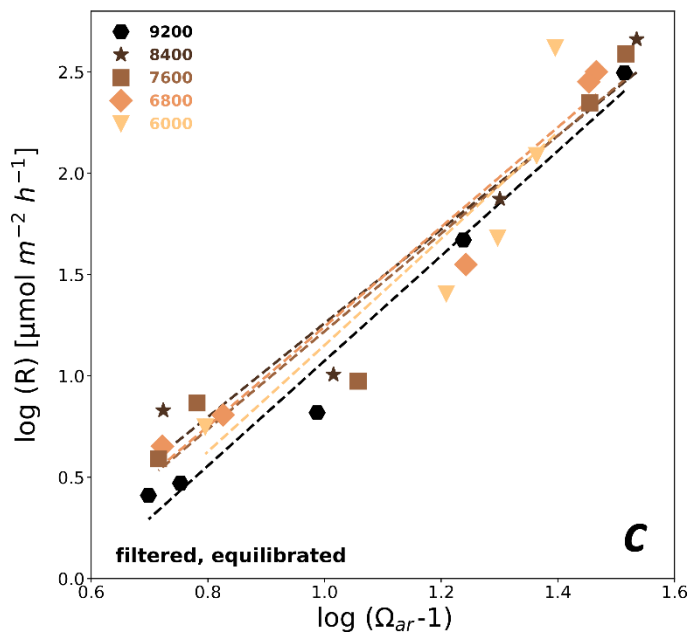

107 Table S8: Overview of all determined reaction orders ( $n$ ), rate constants ( $k$ ) and curve fit coefficients ( $a$ ,  $b$ ,  $c$ ,  $d$ ) for cross-  
 108 comparison.

| Treatment                                    |              | $\log(R) = n(\Omega_{ar} - 1) + \log(k)$ |           | $f(t) = a e^{-be^{-ct}}$ |         |       |         |
|----------------------------------------------|--------------|------------------------------------------|-----------|--------------------------|---------|-------|---------|
|                                              | $\Delta T_A$ | $n$                                      | $\log(k)$ | $a$                      | $b$     | $c$   | $d$     |
| unfiltered non-CO <sub>2</sub> -equilibrated | 2800         | 2.76                                     | -1.50     | -3162.94                 | 5.88    | 0.64  | 4426.60 |
|                                              | 2600         | 2.62                                     | -1.30     | -3184.57                 | 6.66    | 0.66  | 4458.90 |
|                                              | 2400         | 2.98                                     | -1.68     | -3162.95                 | 5.09    | 0.65  | 4466.20 |
|                                              | 2200         | 2.73                                     | -1.45     | -3091.21                 | 5.22    | 0.38  | 4292.50 |
|                                              | 2000         | 2.35                                     | -1.06     | -2841.46                 | 24.49   | 0.40  | 4106.00 |
|                                              | 1800         | 2.45                                     | -1.16     | -2503.10                 | 86.03   | 0.35  | 3924.60 |
|                                              | 1600         | -                                        | -         | -1932.75                 | -252.65 | -0.30 | 3686.50 |
| filtered non-CO <sub>2</sub> -equilibrated   | 3400         | 1.82                                     | -0.30     | -3359.0                  | 4.55    | 0.87  | 4460.4  |
|                                              | 3200         | 2.13                                     | -0.62     | -3368.1                  | 5.76    | 1.08  | 4511.3  |
|                                              | 3000         | 2.24                                     | -0.68     | -3312.2                  | 5.94    | 1.01  | 4437.7  |
|                                              | 2800         | 2.18                                     | -0.62     | -3294.8                  | 4.59    | 0.80  | 4497.5  |
|                                              | 2600         | 2.29                                     | -0.70     | -3333.5                  | 5.17    | 0.84  | 4506.1  |
|                                              | 2400         | 2.25                                     | -0.64     | -3238.0                  | 6.51    | 0.91  | 4426.4  |
|                                              | 2200         | 2.45                                     | -0.93     | -3121.7                  | 8.06    | 0.86  | 4294.1  |
|                                              | 2000         | 2.47                                     | -0.88     | -2976.7                  | 8.75    | 0.59  | 4090.1  |
|                                              | 1800         | 2.38                                     | -0.78     | -2753.5                  | 16.77   | 0.49  | 3943.1  |
| filtered CO <sub>2</sub> -equilibrated       | 9200         | 2.59                                     | -1.52     | -3957.4                  | 4.73    | 1.23  | 11202.3 |
|                                              | 8400         | 2.31                                     | -1.05     | -3522.1                  | 7.65    | 1.26  | 10387.4 |
|                                              | 7600         | 2.41                                     | -1.19     | -3017.7                  | 10.63   | 0.87  | 9646.6  |
|                                              | 6800         | 2.46                                     | -1.22     | -2583.1                  | 11.99   | 0.69  | 8829.9  |
|                                              | 6000         | 2.63                                     | -1.47     | -2499.5                  | 5.50    | 0.33  | 8058.7  |
|                                              | 5200         | -                                        | -         | -1401.0                  | 121.95  | 0.36  | 7273.7  |

109

110

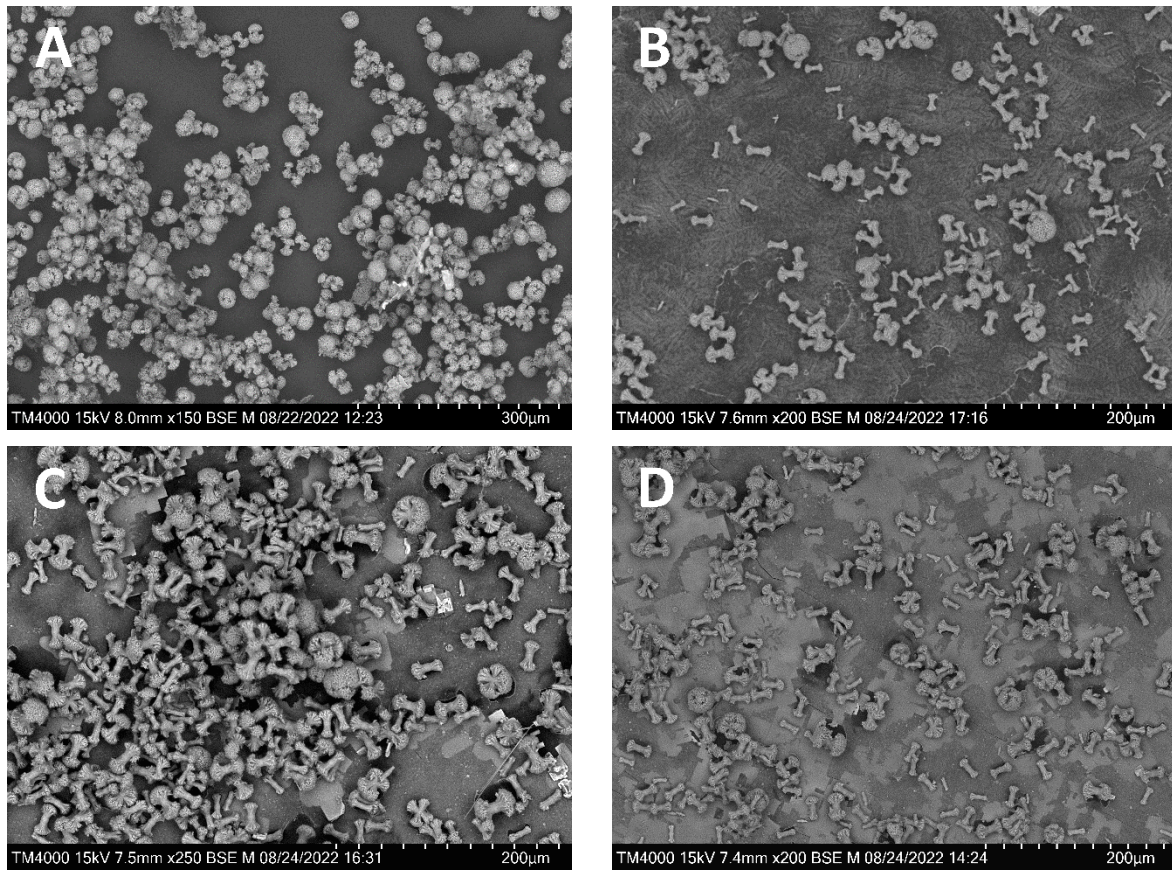

Figure S11: SEM images to determine size distributions, (A) neq filtered  $\Delta TA_{2400}$  Gran Canaria; (B) neq unfiltered  $\Delta TA_{2600}$  Raunefjorden, Bergen; (C) and (D) neq unfiltered  $\Delta TA_{2800}$  – Raunefjorden, Bergen.

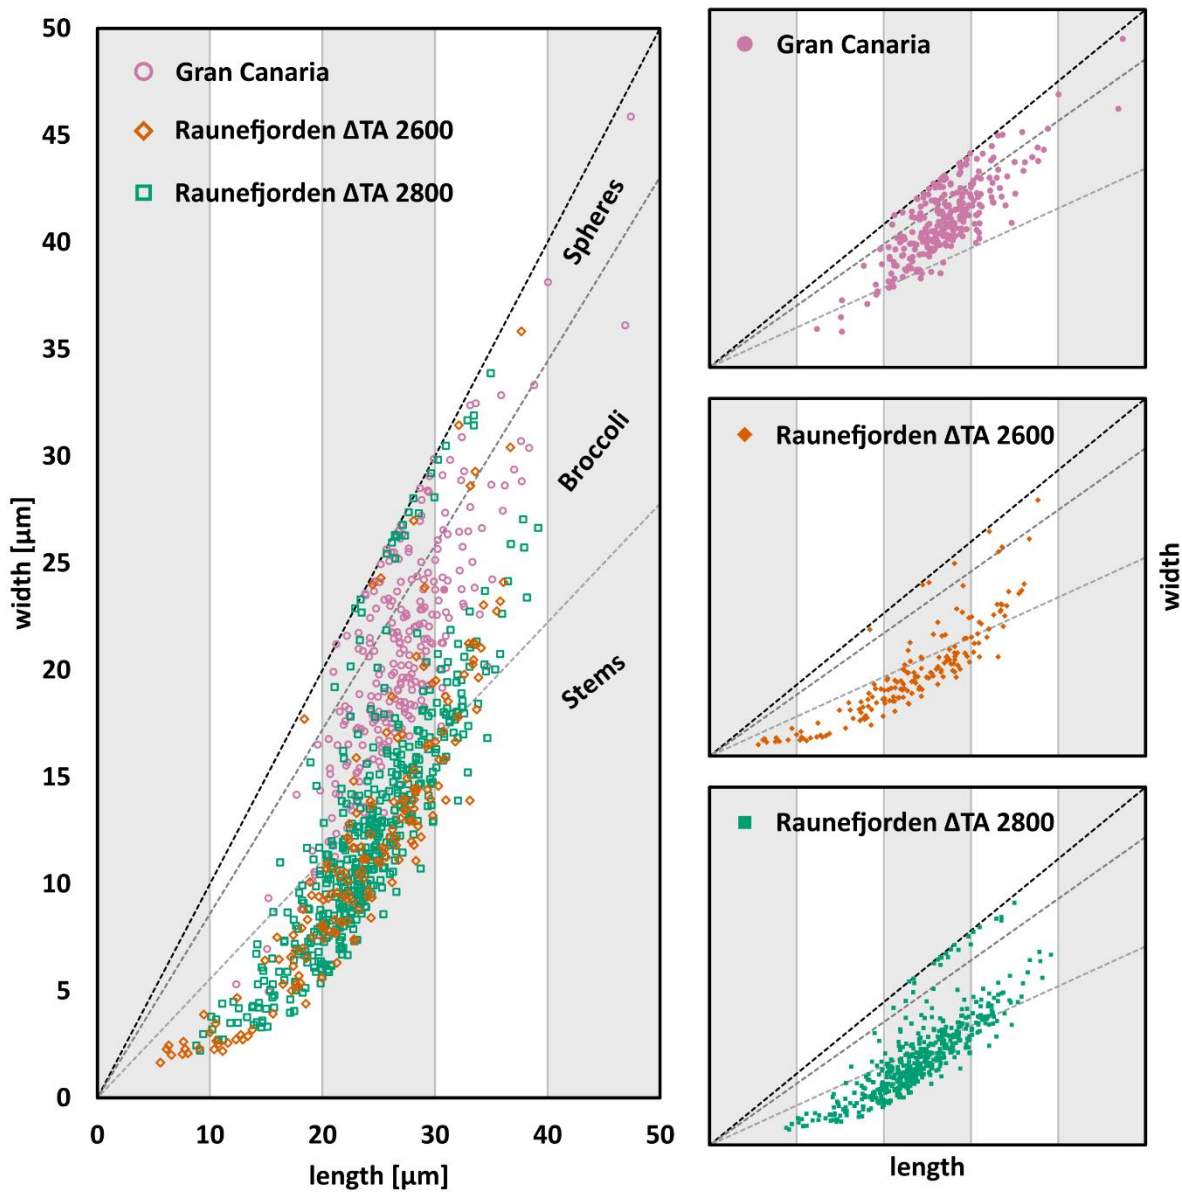

Figure S12: Sizes of precipitated particles during incubation experiments on Gran Canaria (pink circles) (see Hartmann et al., 2023) and in the Raunefjorden, Bergen (see Suitner et al., 2024). Bergen data showcase particles from incubation experiments increasing TA by 2600 (orange diamonds) and 2800  $\mu\text{mol kg}^{-1}$  (green squares); particles were manually counted via SEM images and categorized in three types (spheres, “broccoli” (see Morse et al., 2007 and Suitner et al., 2024), and stems). For a categorization width:length ratios are indicated by dotted lines, sphere (width:length  $>0.9$ ) – broccoli (width:length  $0.5 > x > 0.9$ ) – stems (width:length  $>0.5$ ). See Fig. S11 for original SEM images.

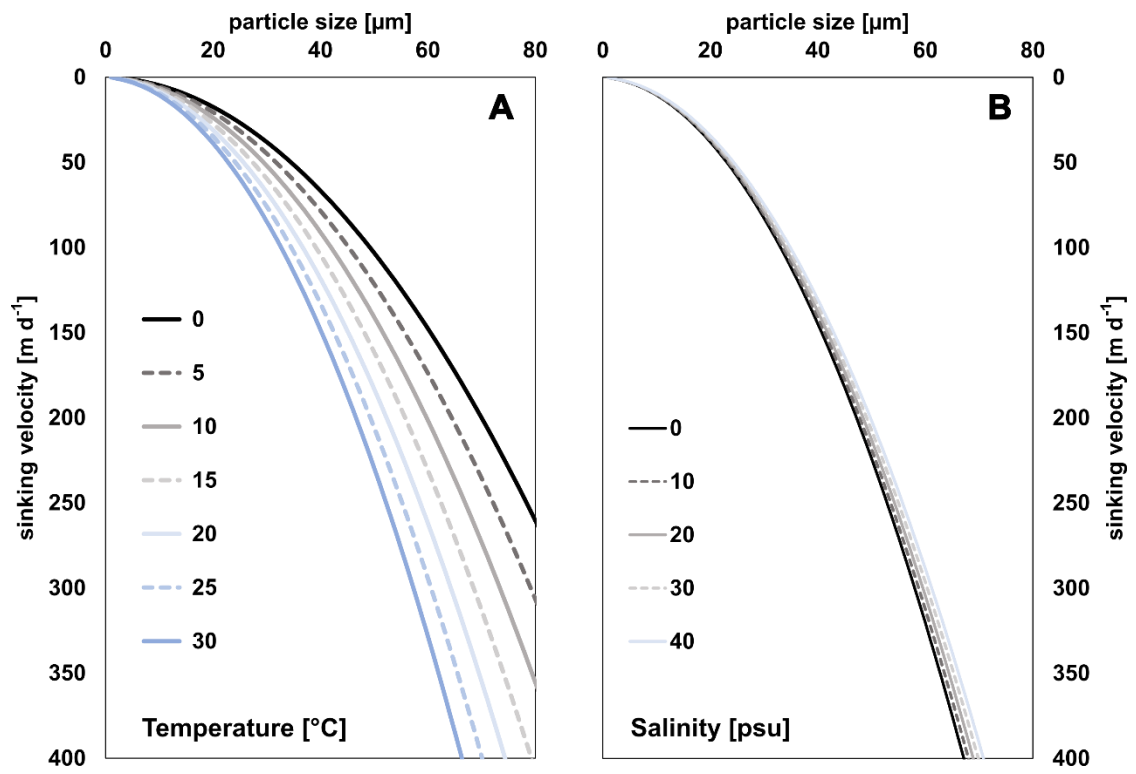

Figure S13: (A) Influence of temperature (salinity fixed to 35 psu) and (B) salinity (temperature fixed to 10°C) variations on sinking velocity.

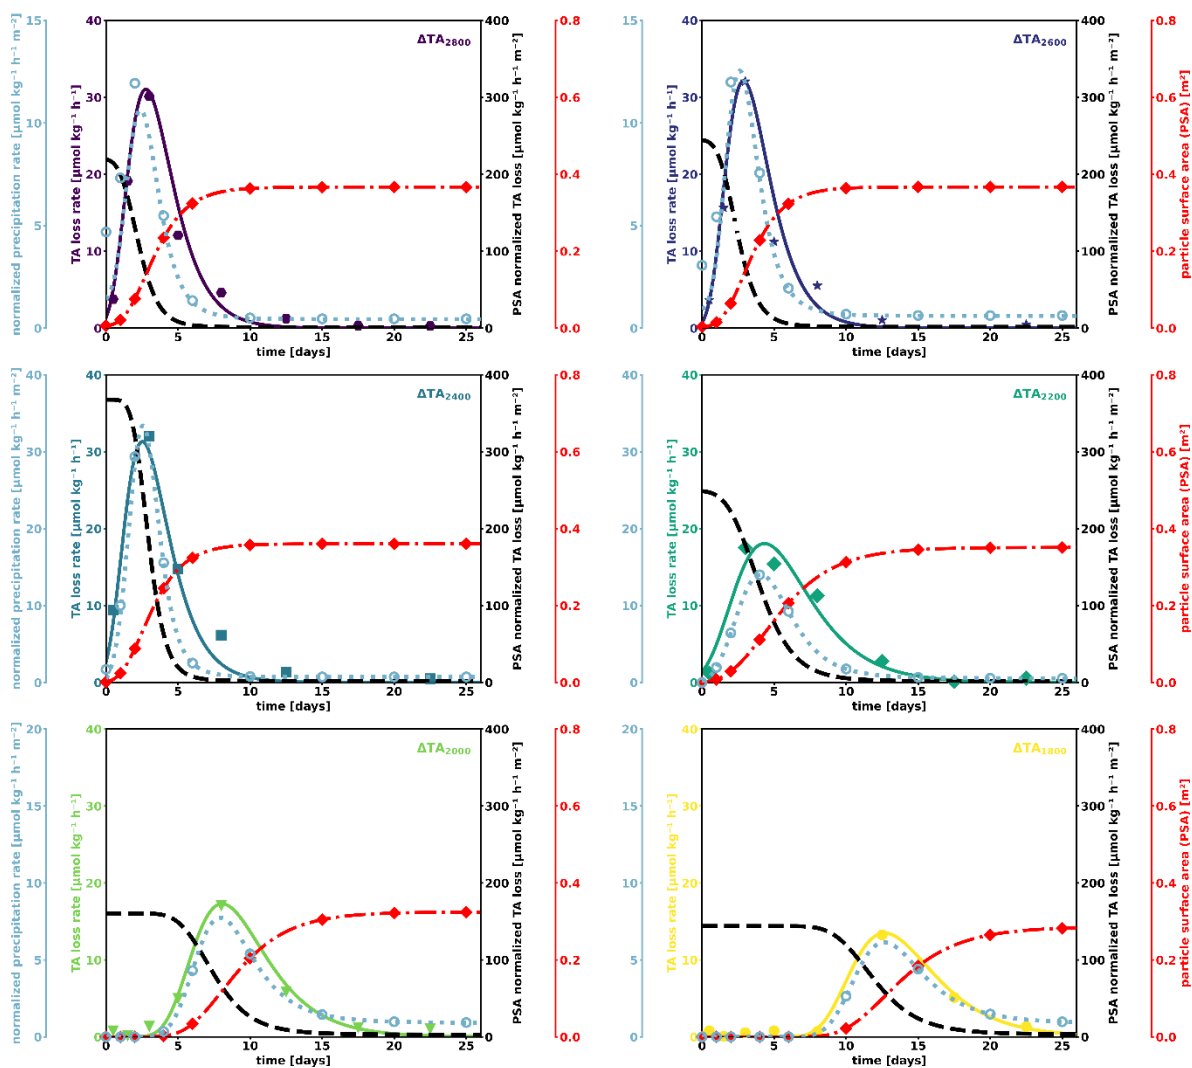

Figure S14: Conceptual figures, showcasing the interplay of  $\Omega_{or}$  and particle surface area guiding the theoretical TA-loss rate evolution (dashed lines) in the unfiltered non- $\text{CO}_2$ -equilibrated treatments (Raunefjorden); particle surface area (dash-dotted, red); curve fitted TA-loss rate (solid lines), measured TA-loss rates are represented by markers of matching colors. Light blue dotted lines: empirical rate equations, including determined rate constants ( $k$ ) and reaction orders ( $n$ ), expected precipitation rate and particle surface area (also see Fig. 8 and related text). Hollow light-blue markers provide the output of the related empirical rate equations for each sampling day (also see Tab. 3). Please note that the scales of the normalized precipitation rate (light blue) are not consistent across all plots.

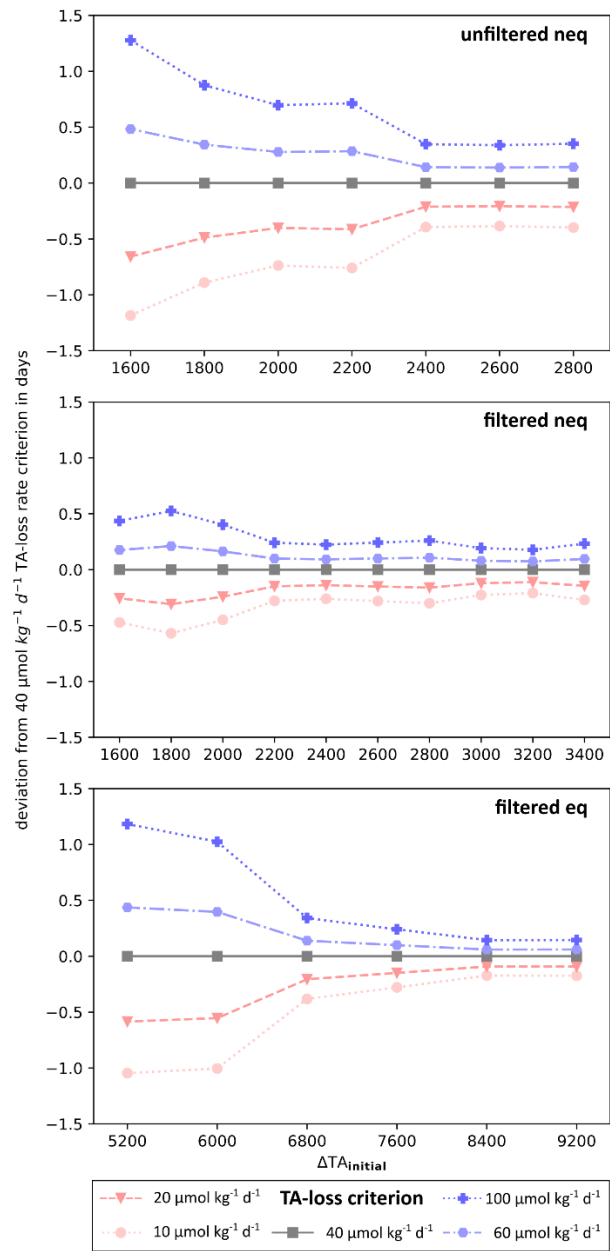

Figure S15: Deviation of onset of the APP with varying TA-loss criteria (see legend) for the unfiltered neq (A), filtered neq (B), and filtered eq (C) experiments.

114 **Conceptual framework to analyze surface area loss during sinking**

115 To estimate the reduction in surface area resulting from the settling of precipitated particles from an assumed  
116 alkalized plume of 10 meters, discrete particle diameter size classes were set in increments of 5  $\mu\text{m}$ : specifically,  
117 0-5  $\mu\text{m}$ , 5-10  $\mu\text{m}$ , 10-15  $\mu\text{m}$ , 15-20  $\mu\text{m}$ , 20-25  $\mu\text{m}$ , 25-30  $\mu\text{m}$ , and 30-35  $\mu\text{m}$ . These size classes are based on the  
118 distinct particle classifications outlined in section 3.6 and in the study by Suitner et al. (2024). With the known  
119 size distributions and aragonite formation rates, treatment level  $\Delta\text{TA}_{2800}$  from the unfiltered non- $\text{CO}_2$ -  
120 equilibrated experiment (Raunefjorden) was employed as an analogous example to demonstrate the concept of  
121 the surface area reduction resulting from particle sinking.

122 To simplify the calculations, particles were assumed to be spheres with equivalent spherical diameters (ESD)  
123 corresponding to the specified size classes. Particles were allowed to transition to the next larger size class in  
124 increments of 4 hours, following constant transition factors. Derived from the curve-fitted TA-loss rates, the mass  
125 of precipitated aragonite particles is known. When combined with the known size class distribution after 6 days,  
126 transition factors and particle counts for each size class can be calculated (see Fig. S10). By assuming uniform  
127 sinking velocities for each discrete size class and applying the calculation method outlined in section 3.6, the  
128 distance traveled during the sinking process can be calculated for all possible combinations of size class  
129 transitions. Based on a set particle surface area of  $2.283 \text{ m}^2 \text{ g}^{-1}$  (see section 2.3), the decrease in available surface  
130 area for heterogeneous precipitation can therefore be estimated. Since the available surface area is proportional  
131 to the precipitation rate (Eq. 4), the settling of precipitated particles would delay or even stop the precipitation  
132 process. Assuming a 10 m alkalized layer, the present example suggests that the available surface area would be  
133 reduced by  $\sim 35\%$ , if an export mechanism is incorporated in the treatment level  $\Delta\text{TA}_{2800}$  from the unfiltered non-  
134  $\text{CO}_2$ -equilibrated experiment.

135

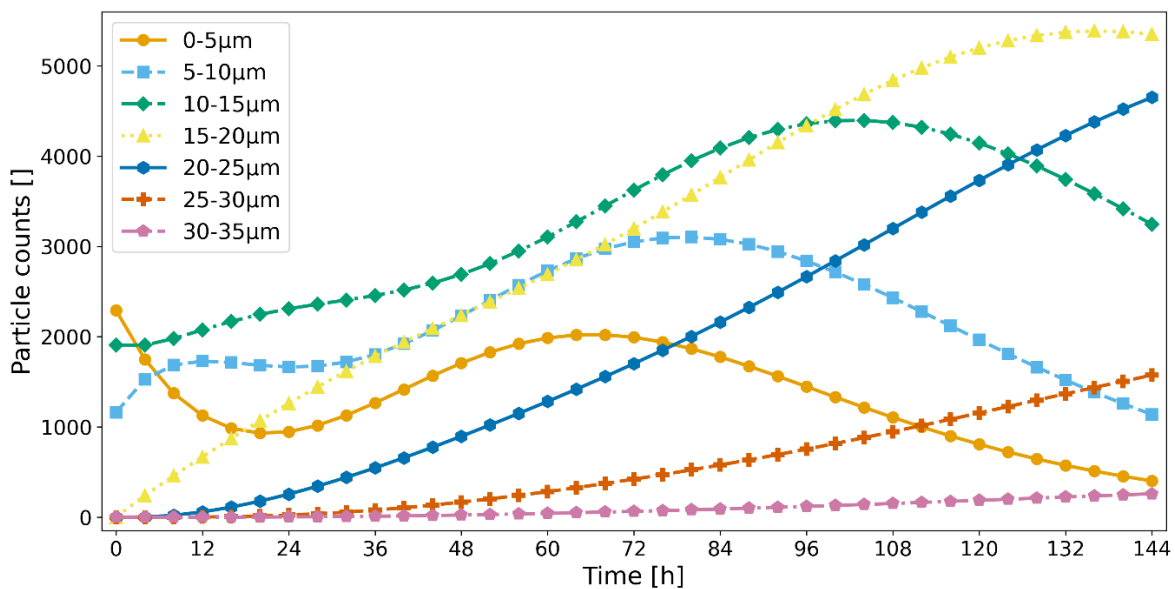

Figure S16: Temporal evolution of particle counts for each designated size class; see text above for details on the calculations and methodology used.

136
